# Supplementary material for: Gas Barrier Performance of Hexagonal Boron Nitride Monolayers Grown on Copper Foils with Electrochemical Polishing
Source: MDPI journal article supplement (doi:10.3390/app11104599), 2021-05-18
Supplement: s1 [file s1]

Archive with 1 entries (1 files):
- applsci-1204048-supplementary.pdf
