# Supplementary material for: Gas Barrier Performance of Hexagonal Boron Nitride Monolayers Grown on Copper Foils with Electrochemical Polishing
Source: MDPI journal article supplement (doi:10.3390/app11104599), 2021-05-18
Supplement: s1 [file s1 › applsci-1204048-supplementary.pdf]

## Supporting information

# Gas Barrier Performance of Hexagonal Boron Nitride Monolayers Grown on Copper Foils with Electrochemical Polishing

Chil-Hyoung Lee <sup>1,†</sup>, Go-Bong Choi <sup>2,†</sup>, Eun-Mi Kim <sup>1,3</sup>, Jongho Lee <sup>1</sup>, Jaegun Lee <sup>4</sup>, Hi-Gyu Moon <sup>5</sup>, Myung-Jong Kim <sup>6</sup>, Yoong-Ahm Kim <sup>2,\*</sup> and Tae-Hoon Seo <sup>1,\*</sup>

Smart Energy & Nano Convergence Research Group, Korea Institute of Industrial Technology,  
Gwangju 61012, Korea; chlee0901@kitech.re.kr (C.-H.L.); kimeunmi@kitech.re.kr (E.M.K.); jholee@kitech.re.kr (J.L.)

<sup>2</sup> Department of Polymer Engineering, Graduate School, Alan G. MacDiarmid Energy Research Institute & School of Polymer Science and Engineering, Chonnam National University, Gwangju 61186, Korea; uppermost.peak@gmail.com (G.B.C.)

<sup>3</sup> School of Materials Science & Engineering, Chonnam National University, 77 Yongbong-ro, Buk-gu, Gwangju 61186, Korea

<sup>4</sup> Department of Organic Material Science and Engineering, Pusan National University, 2, Busandaehak-ro 63 beon-gil, Geumjeong-gu, Busan 46241, Korea; jglee@pusan.ac.kr

<sup>5</sup> Department of Inhalation Toxicology Research Center, Korea Institute of Toxicology, Jeongeup 56212, Korea; higyu.moon@kitox.re.kr

<sup>6</sup> Department of Chemistry, Gachon University, 1342 Seongnam-daero, Sujeong-gu, Seongnam-si, Gyeonggi-do 13120, Korea; myungjongkim@gachon.ac.kr

\* Correspondence: yak@chonnam.ac.kr, thseo@kitech.re.kr

† These authors contributed equally to this work.

**Keywords:** two-dimensional, h-BN, gas barrier, electrochemical polishing,

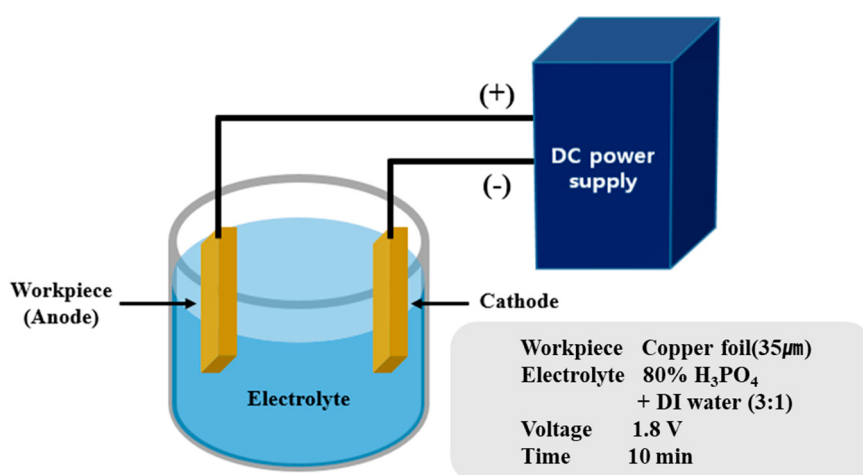

**Figure S1.** Schematics and experimental conditions of electrochemical polishing for Cu foils.

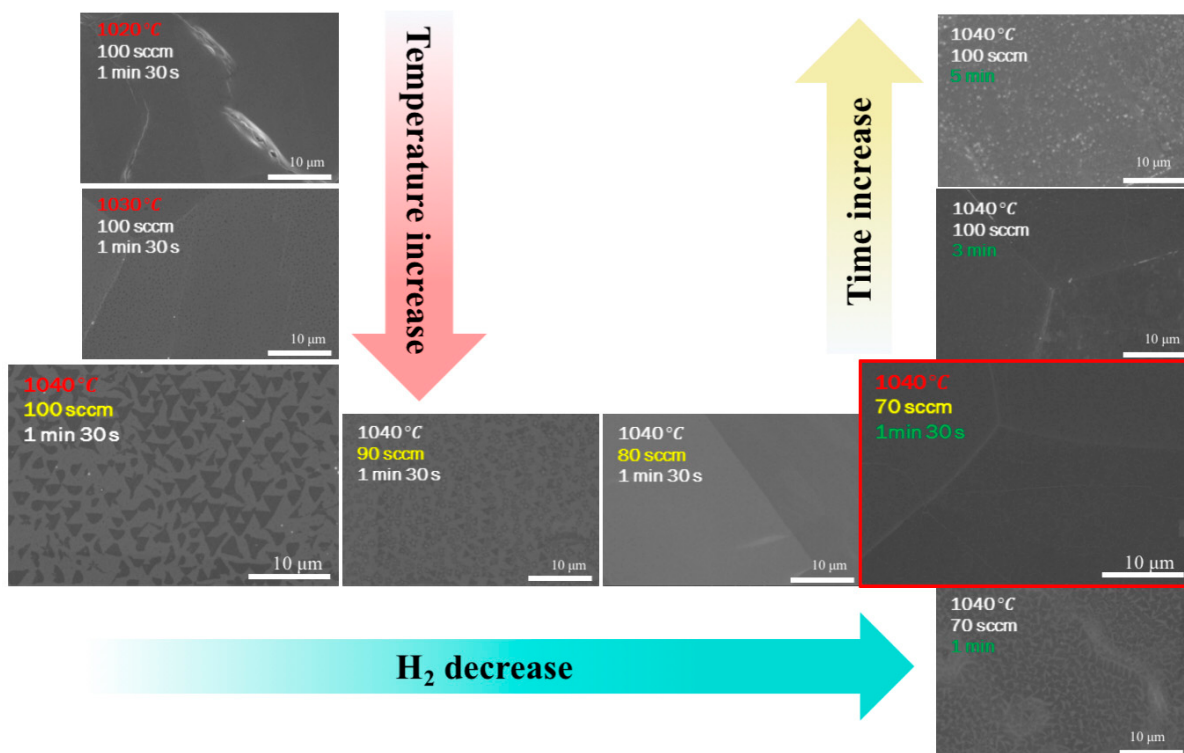

**Figure S2.** The optimization process of synthesis conditions for high quality and uniform h-BN

**(a) Without ECP**

**(b) With ECP**

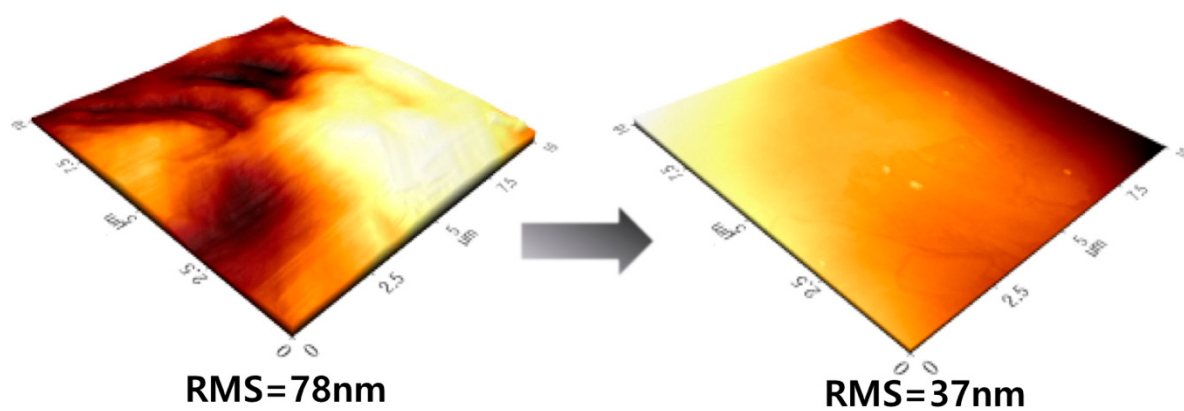

**Figure S3.** AFM images and RMS roughness of Cu foils (a) without ECP and (b) with ECP, respectively.
